# Supplementary figures and images for: Kinetic characterizations of diallyl sulfide analogs for their novel role as CYP2E1 enzyme inhibitors
Source: PubMed Central journal article supplement — Pharmacol Res Perspect. 2017 Sep 27;5(5):e00362. doi: 10.1002/prp2.362 (PMC5625166; doi:10.1002/prp2.362), 2017-09-27

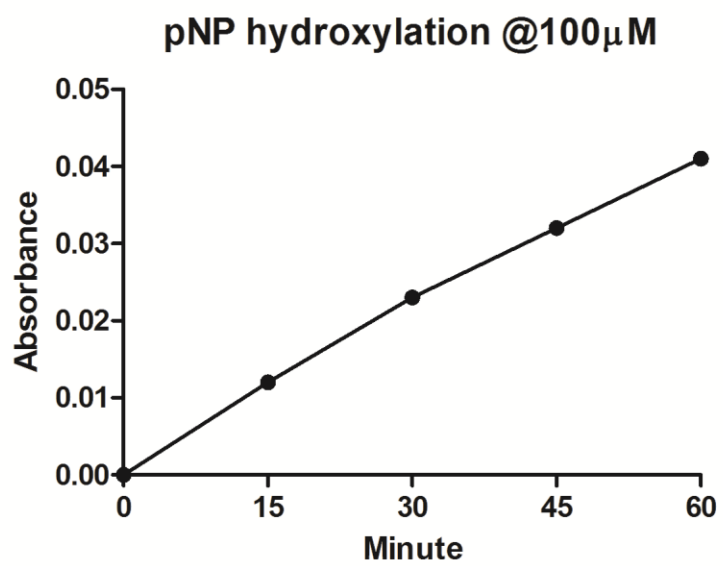

Supplement Figure 1

Supplement: PRP2-5-e00362-s001.pdf [file PRP2-5-e00362-s001.pdf]
